# Supplementary material for: Impacts of cryopreservation on phenotype and functionality of mononuclear cells in peripheral blood and ascites
Source: PubMed Central journal article supplement (PMC10956725; doi:10.2478/jtim-2023-0136), 2024-03-21
Supplement: jtim-2023-0136_sm.pdf [file jtim-2023-0136_sm.pdf]

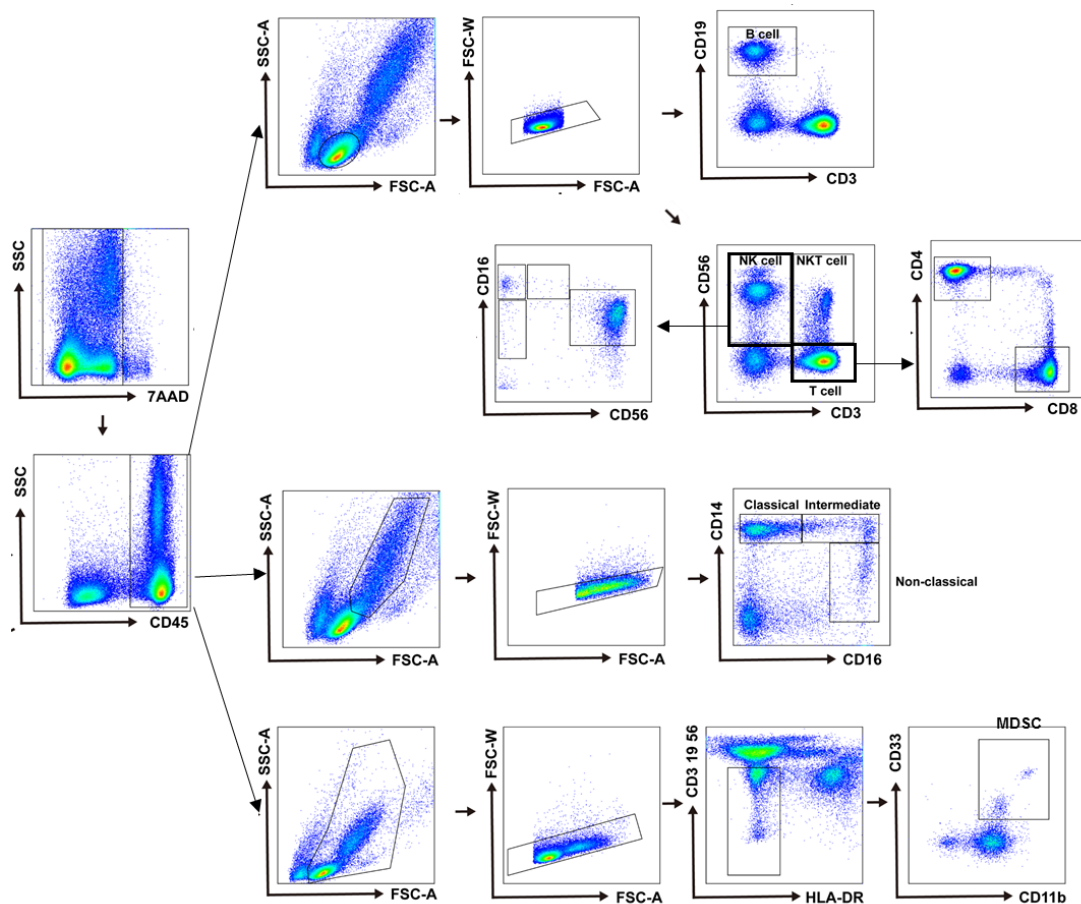

Supplementary Figure 1: Gating strategy.

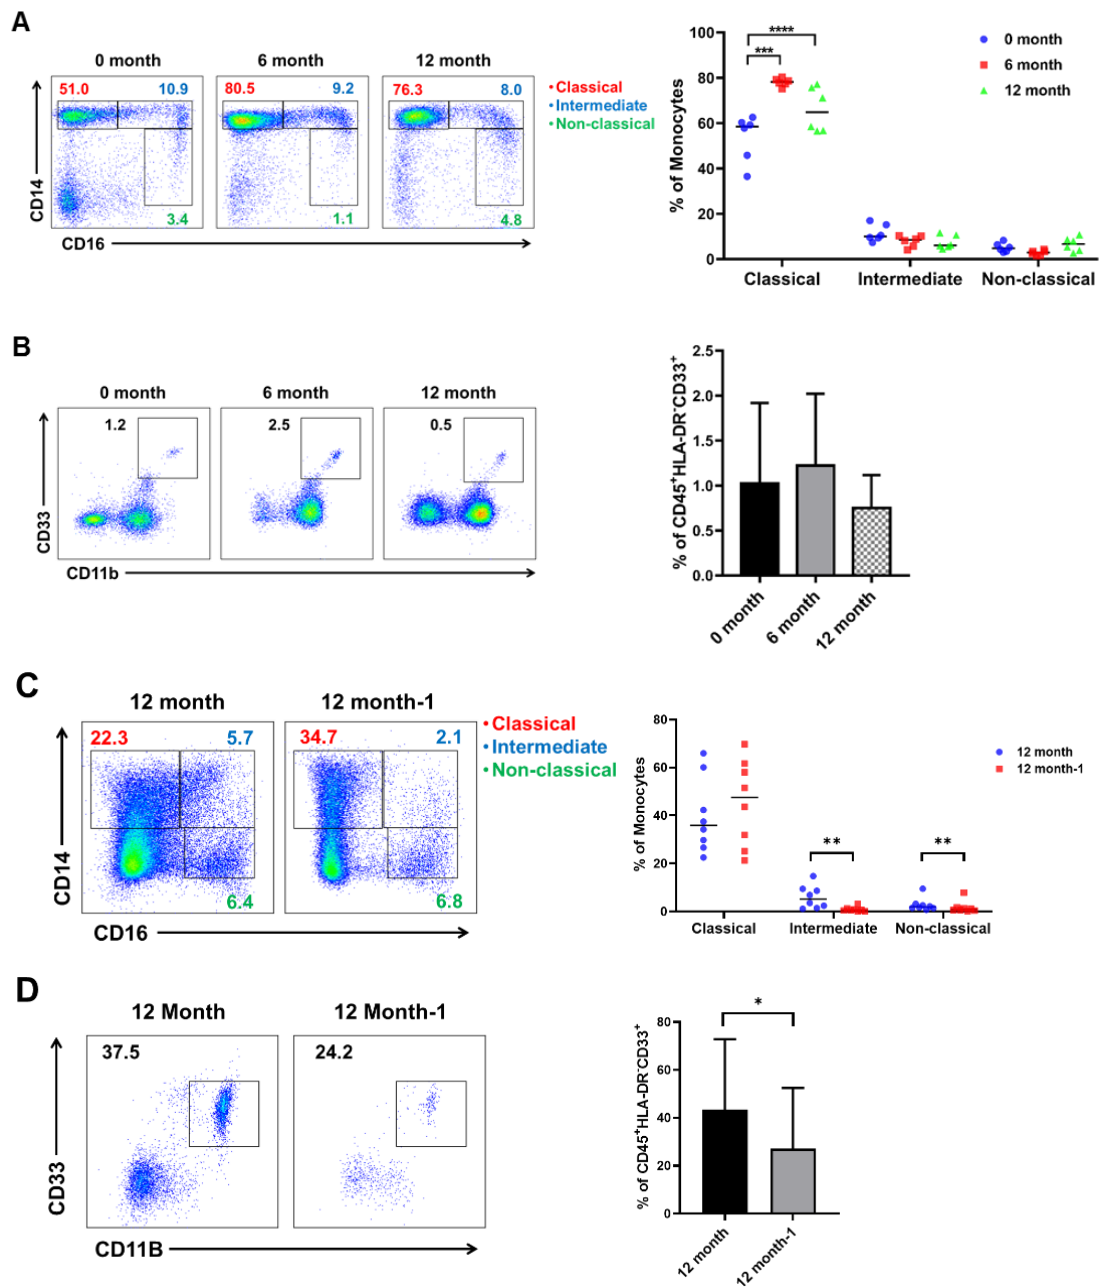

**Supplementary Figure 2:** Effects of long-term cryopreservation on monocytes and MDSCs. (A) The proportion of different subsets in monocytes of PBMCs after cryopreservation ( $n = 6$ ). (B) The proportion of MDSCs of PBMCs after cryopreservation ( $n = 13$ ). (C) The proportion of different subsets in monocytes of ascites after cryopreservation ( $n = 8$ ). (D) The proportion of MDSCs of ascites after cryopreservation ( $n = 8$ ). \* $P < 0.05$ ; \*\* $P < 0.01$ ; \*\*\* $P < 0.001$ ; \*\*\*\* $P < 0.0001$ .

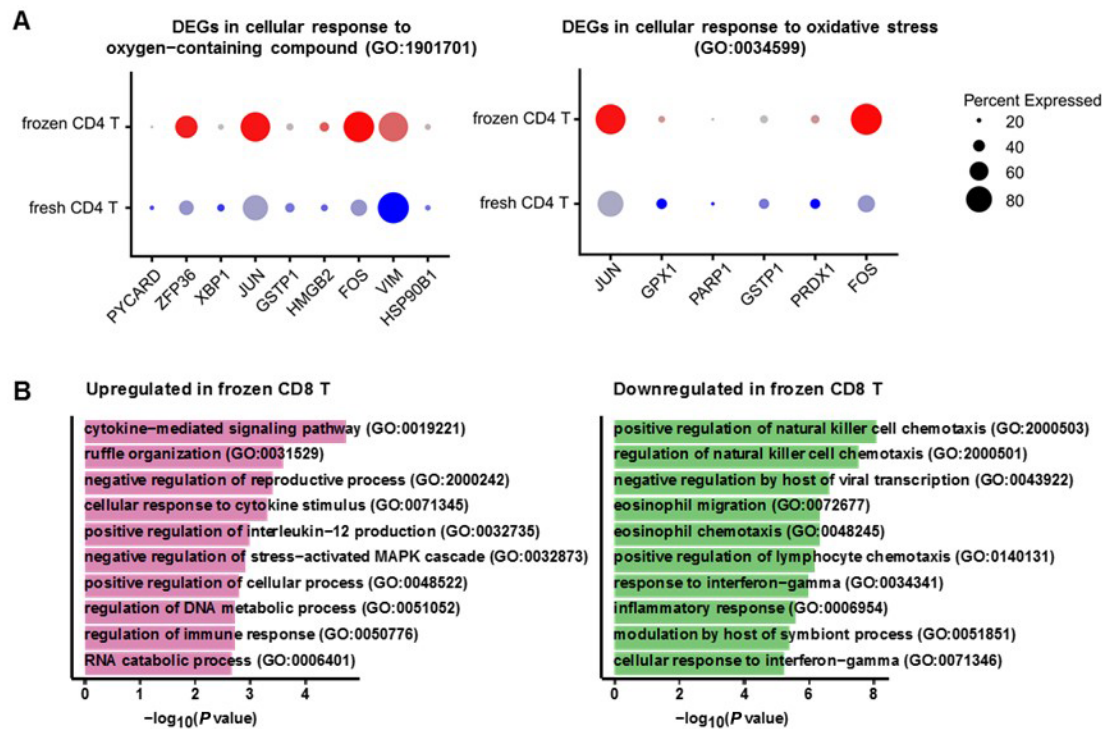

**Supplementary Figure 3:** GO term enrichment of DEGs between cryopreserved and fresh T cells. (A) DEGs between frozen and fresh CD4<sup>+</sup> T cells that enriched in cellular response to oxygen-containing compound (GO:1901701) and cellular response to oxidative stress (GO:0034599). (B) GO term enrichment of DEGs between cryopreserved and fresh CD8<sup>+</sup> T cells.

**Supplementary table 1. Reagent used in this research**

| <b>Reagent</b>                 | <b>Com</b>     | <b>Catalog</b> | <b>Clone</b> |
|--------------------------------|----------------|----------------|--------------|
| BV650 anti-human CD45          | BD Biosciences | 563717         | HI30         |
| FITC anti-human CD3            | Biolegend      | 300306         | HIT3a        |
| APC-Cy7 anti-human CD3         | Biolegend      | 300426         | UCHT1        |
| PE anti-human CD4              | Biolegend      | 300508         | RPA-T4       |
| APC-Cy7 anti-human CD4         | Biolegend      | 357416         | A161A1       |
| PerCP-cy5.5 anti-human CD8     | Biolegend      | 344710         | SK1          |
| BV421 anti-human CD8           | BD Biosciences | 562428         | RPA-T8       |
| APC-Cy7 anti-human CD19        | Biolegend      | 302218         | HIB19        |
| PE-Cy7 anti-human CD56         | Biolegend      | 318318         | HCD56        |
| APC-Cy7 anti-human CD56        | Biolegend      | 362512         | 5.1H11       |
| BV605 anti-human CD16          | BD Biosciences | 740436         | B73.1        |
| PE-Cy7 anti-human HLA-DR       | Biolegend      | 307616         | L243         |
| PE-CF594 anti-human CD14       | Biolegend      | 325634         | HCD14        |
| APC anti-human CD33            | Biolegend      | 303408         | WM53         |
| FITC anti-human CD11b          | Biolegend      | 301330         | ICRF44       |
| PE anti-human CD15             | Biolegend      | 301906         | HI98         |
| BV650 anti-human CD45RA        | BD Biosciences | 563963         | HI100        |
| PE-CF594 anti-human CCR7       | Biolegend      | 353236         | G043H7       |
| APC anti-human Granzyme B      | Biolegend      | 372204         | QA16A02      |
| FITC anti-human IFN- $\gamma$  | Biolegend      | 502506         | 4S.B3        |
| BV605 anti-human IL-2          | Biolegend      | 500331         | MQ1-17H12    |
| 7-AAD                          | Biolegend      | 420404         |              |
| CFSE Cell Division Tracker Kit | Biolegend      | 423801         | -            |
